# Supplementary material
Source: PubMed Central journal article supplement (PMC3560927)
Supplement: NIHMS429414-supplement-1.pdf [file NIHMS429414-supplement-1.pdf]

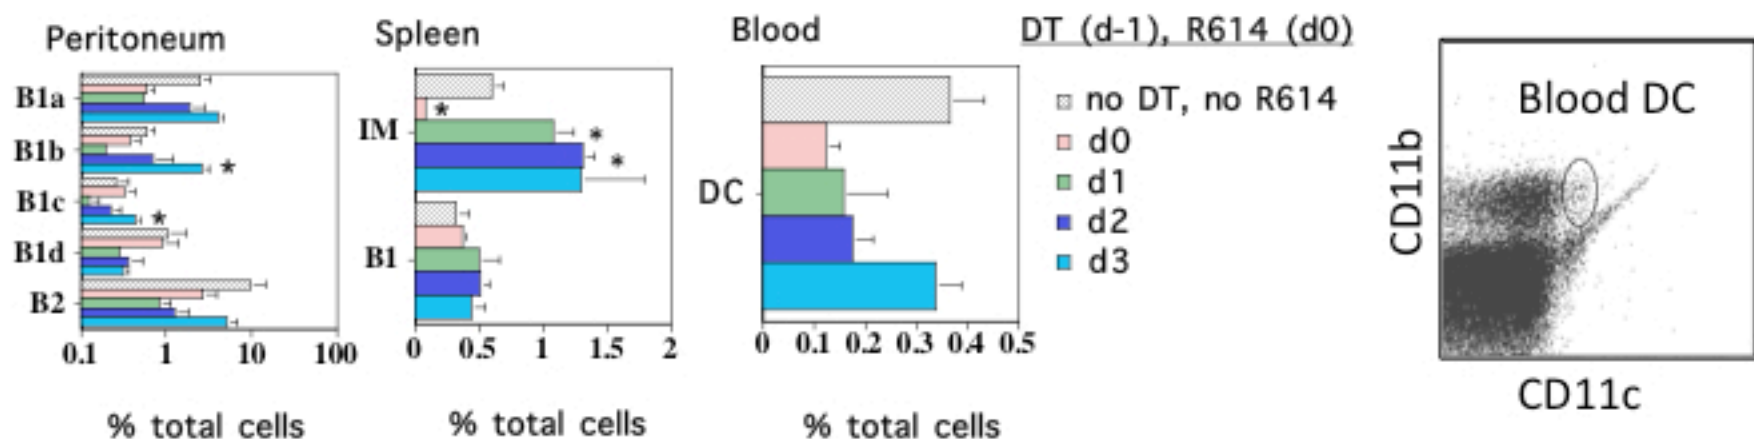

**Supplementary Figure 1.** CD11b-DTR chimeric mice (3 mice/group) were injected 1x with DT (700 ng DT/mouse) followed by i.p. immunization with R614 (d0), and then 1, 2, and 3 days following R614 immunization (d1, d2, d3). The percentage of each cell type, as defined in the text, is indicated as the arithmetic mean +/- SEM (\*significance  $p \leq 0.05$ ). The total cell yields for each group did not differ significantly.
